# Supplementary material
Source: PubMed Central journal article supplement (PMC2723018)
Supplement: blood-2008-12-195883_1.pdf [file blood-2008-12-195883_1.pdf]

| <b>Ploidy</b> | <b>Control</b> | <b>ST DEV (±)</b> | <b>Nox2 KO</b> | <b>ST DEV (±)</b> |
|---------------|----------------|-------------------|----------------|-------------------|
| <b>2n</b>     | 24.35          | 3.096             | 18.24          | 1.6               |
| <b>4n</b>     | 9.31           | 1.25              | 6.19           | 1.28              |
| <b>8n</b>     | 9.84           | 0.83              | 8.61           | 4.67              |
| <b>16n</b>    | 35.74          | 1.53              | 40.64          | 3.12              |
| <b>32n</b>    | 12.88          | 3                 | 19.31          | 7.8               |
| <b>64n</b>    | 1.73           | 0.47              | 1.65           | 0.58              |

Nox2 KO= NADPH oxidase 2 Knockout

Wt= Wild type

ST DEV= Standard Deviation.

Subgroups were compared using *t*-test., n=4. No significant difference was found (p> 0.05).
